# Supplementary material
Source: PubMed Central journal article supplement (PMC9160002)
Supplement: 41401_2021_753_MOESM6_ESM.pdf [file 41401_2021_753_MOESM6_ESM.pdf]

This document certifies that the manuscript

Discovery of novel MIF inhibitors against microglial inflammatory activation in vitro-based virtual screening with multiple receptor structures and bioassays

prepared by the authors

Yu Zhang<sup>1#</sup>, Lei Xu<sup>2#</sup>, Yao Zhang<sup>1#</sup>, Jie Pan<sup>1</sup>, Pu-qing Wang<sup>1</sup>, Sheng Tian<sup>3</sup>, Huan-ting Li<sup>4</sup>, Bo-wen Gao<sup>4</sup>, Ting-jun Hou<sup>5\*</sup>, Xue-chu Zhen<sup>3\*</sup>, Long-Tai Zheng<sup>3\*</sup>

was edited for proper English language, grammar, punctuation, spelling, and overall style by one or more of the highly qualified native English speaking editors at SNAS.

This certificate was issued on **July 16, 2021** and may be verified on the [SNAS website](#) using the verification code **F67D-9686-B109-E64F-A70E**.

Neither the research content nor the authors' intentions were altered in any way during the editing process. Documents receiving this certification should be English-ready for publication; however, the author has the ability to accept or reject our suggestions and changes. To verify the final SNAS edited version, please visit our verification page at [secure.authorservices.springernature.com/certificate/verify](https://secure.authorservices.springernature.com/certificate/verify).

If you have any questions or concerns about this edited document, please contact SNAS at [support@as.springernature.com](mailto:support@as.springernature.com).
